# Supplementary material
Source: bioRxiv or medRxiv preprint supplement (https://www.biorxiv.org/highwire/filestream/104753/field_highwire_adjunct_files/0/344234-1.pdf)
Supplement: Supplementary file [file 344234-1.pdf]

**A**

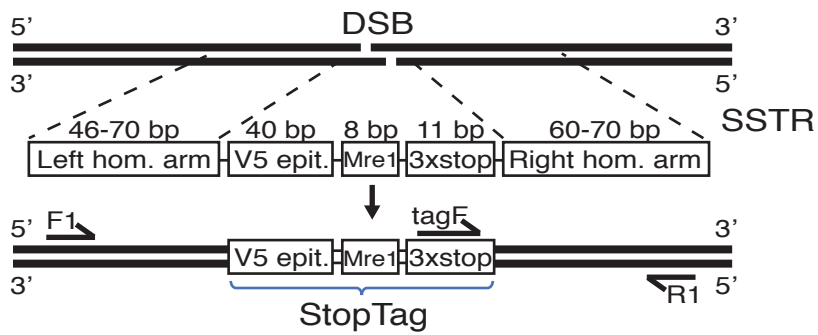

**B**

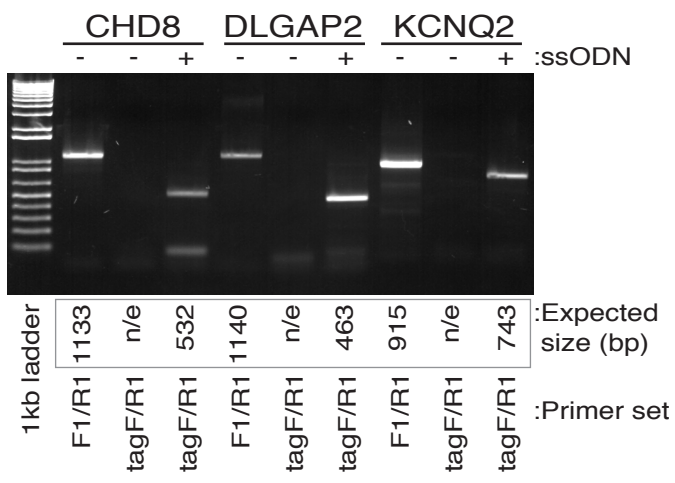

Figure S1 Validation of StopTag insertion in HEK293T cells. (A) Scheme of the single-stranded oligonucleotide DNA (ssODN) template used to splice the StopTag sequence into target genomic DNA; DBS = double-strand break; SSTR = single-stranded template repair; hom. = homology; epit. = epitope; F1, tagF, R1 = PCR primers. (B) Validation of StopTag insertion by PCR amplification of three selected target loci, i.e., *CHD8*, *DLGAP2* and *KCNQ2*, in HEK293T cells using corresponding primer sets [F1, tagF, R1 referring to (A)]. bp = base pair

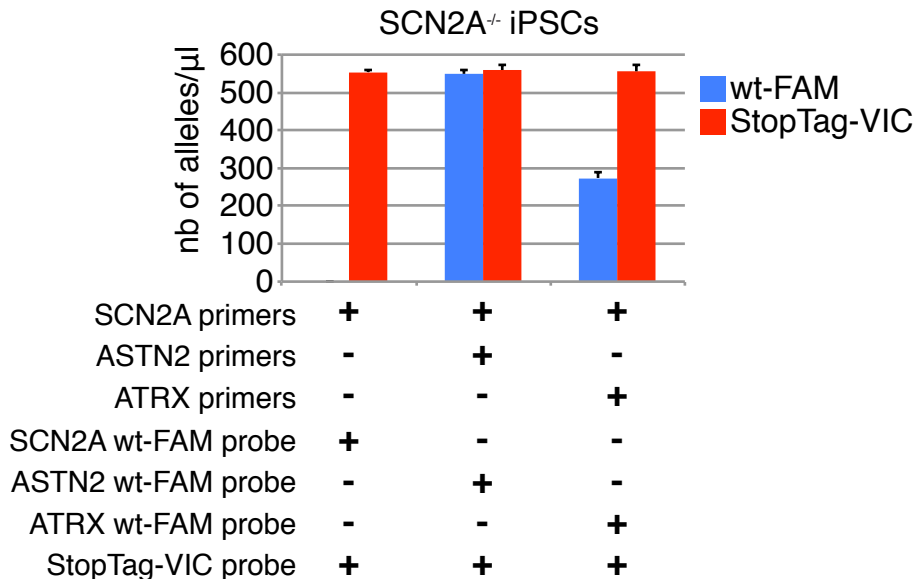

Figure S2 Confirmation of StopTag insertion and zygosity in different target loci in the human iPSC line 19-2. Representative verification of homozygosity of StopTag insertion in SCN2A<sup>StopTag/StopTag</sup> (SCN2A<sup>-/-</sup>) iPSCs using SCN2A primers/StopTag-VIC probe along with ASTN2 primers/ASTN2wt-FAM probe. No significant difference was observed between the number of SCN2A-associated StopTag-VIC alleles and the number of ASTN2-associated wt-FAM alleles, i.e., both were homozygous. The same comparison was performed with the hemizygous allele ATRX, where only half of the wt-FAM alleles were detected. Values are presented as mean $\pm$ SD of three amplification reactions. wt = wild-type

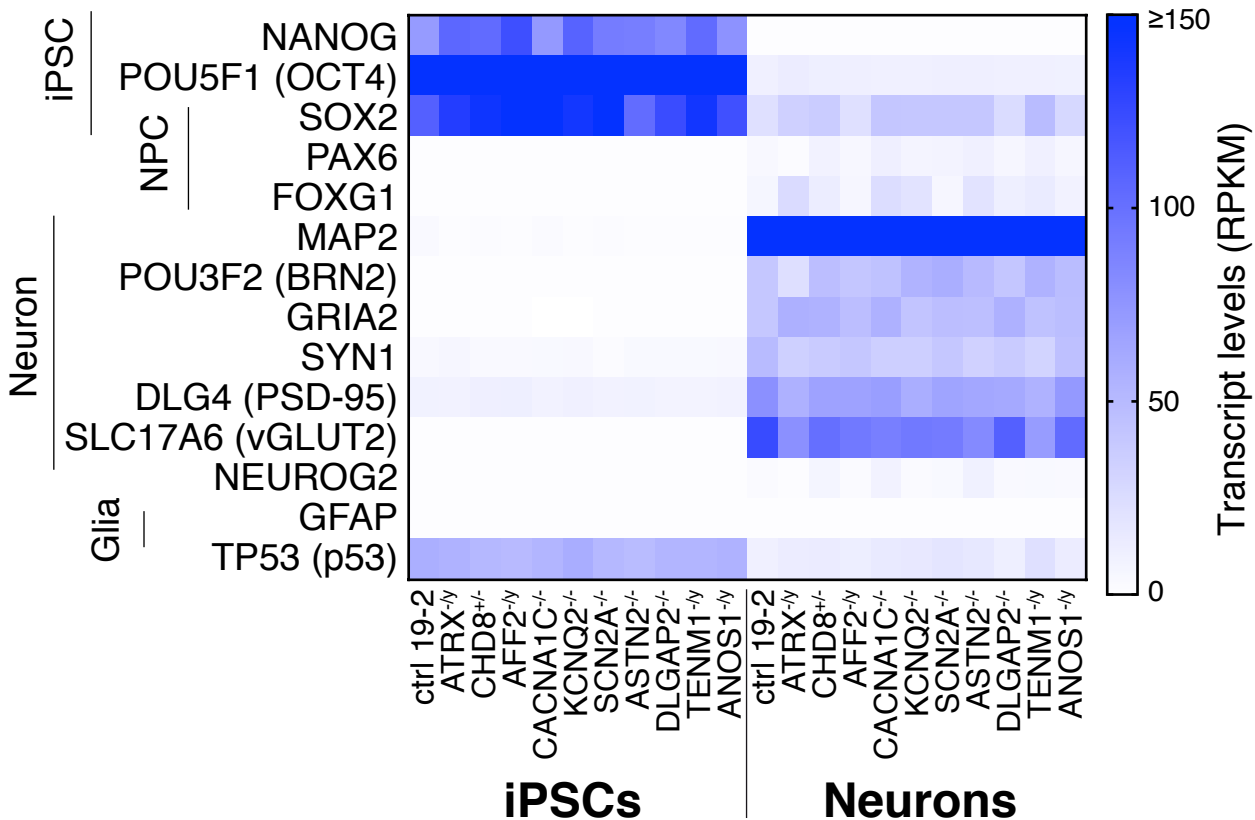

Figure S3 Transcript levels in RPKM of selected iPSC, NPC and neuronal markers in all KO cell lines. Values are presented as mean $\pm$ SD of (n) independent experiments; n = 8 for ctrl 19-2, n = 4 for ATRX<sup>-ly</sup>, CHD8<sup>+/-</sup>, KCNQ2<sup>-/-</sup>, SCN2A<sup>-/-</sup>, ASTN2<sup>-/-</sup>, DLGAP2<sup>-/-</sup>, ANOS1<sup>-ly</sup>; n = 2 for AFF2<sup>-ly</sup>, CACNA1C<sup>-/-</sup> and TENM1<sup>-ly</sup> iPSCs; n = 5 for AFF2<sup>-ly</sup> and TENM1<sup>-ly</sup>; n = 4 for ctrl 19-2, ATRX<sup>-ly</sup>, CHD8<sup>+/-</sup>, KCNQ2<sup>-/-</sup>, SCN2A<sup>-/-</sup>, DLGAP2<sup>-/-</sup>, ANOS1<sup>-ly</sup>; n = 3 for CACNA1C<sup>-/-</sup> and ASTN2<sup>-/-</sup> neurons. Note that color gradient ranges from 0 to 150 RPKM; all RPKM values  $\geq$ 150 are presented with the same blue intensity as 150.

## Control 50B

A

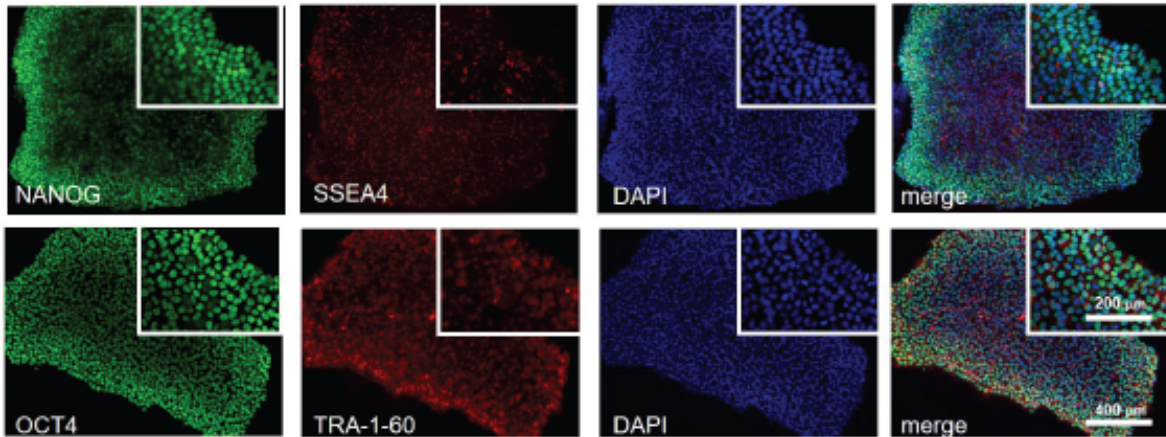

B

## Control 50B

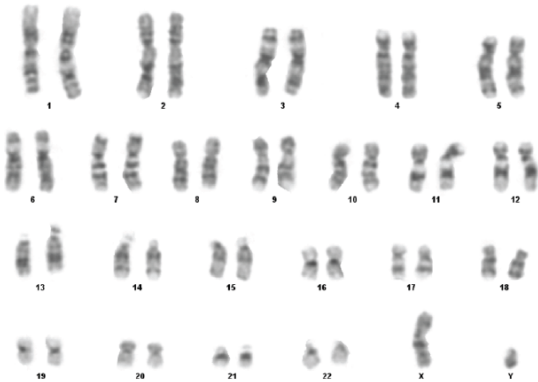

Figure S4 Characterization of the control 50B iPSC line. (A) Immunohistochemistry revealing expression of the pluripotency markers NANOG, SSEA4, OCT4 and TRA-1-60. (B) 50B iPSCs presented a normal male karyotype; 20 cells were examined.

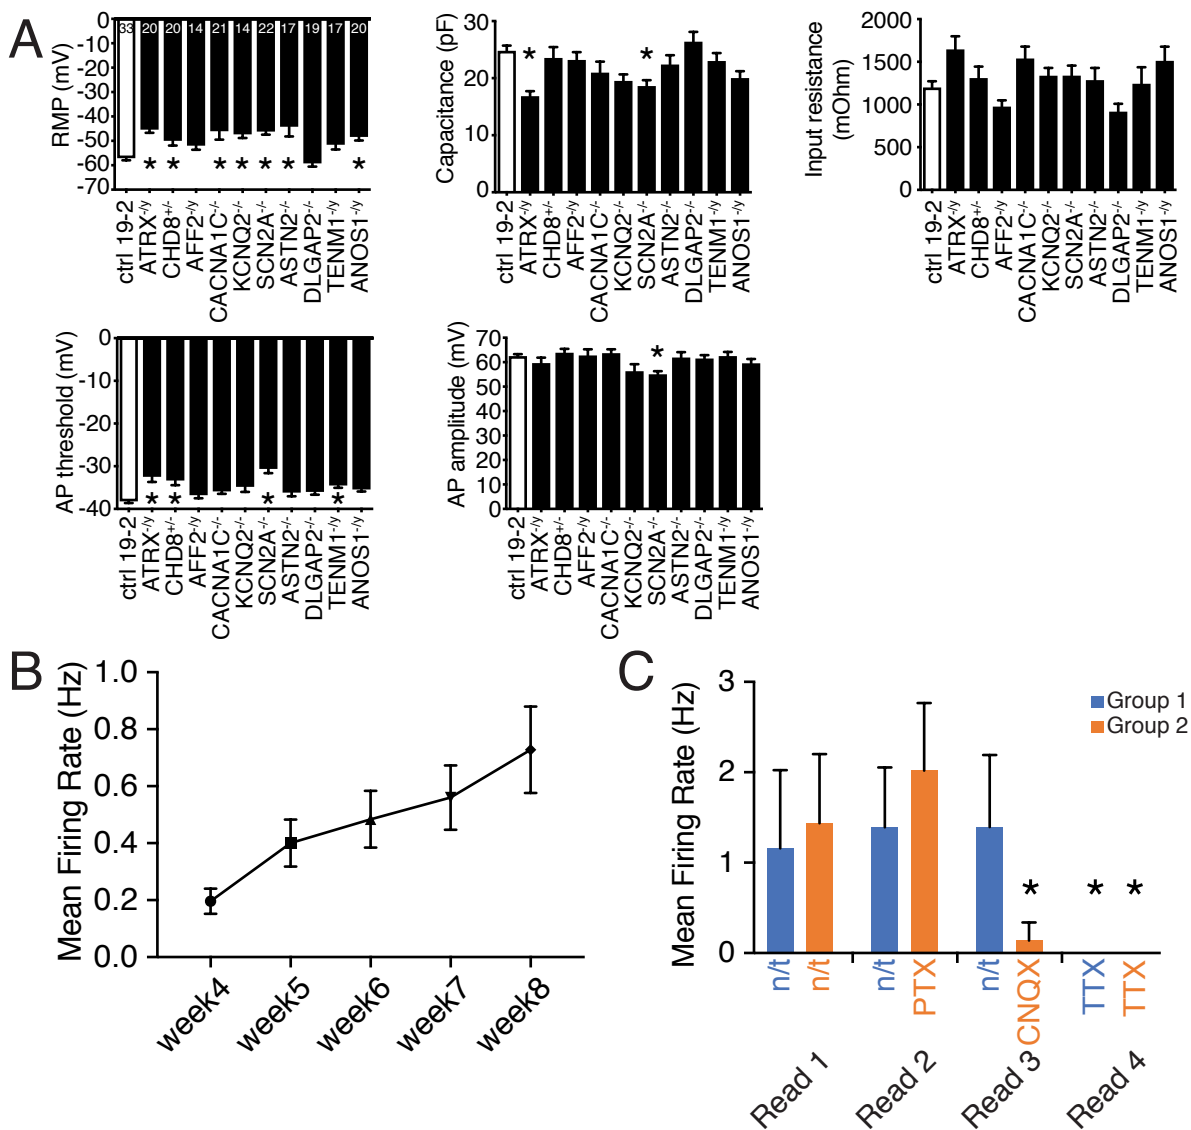

Figure S5 Electrophysiological phenotyping of KO iPSC-derived neurons. (A) Different intrinsic properties detected by patch-clamp recordings; the number of recorded neurons is indicated in the bars of the top left graph; values are presented as mean $\pm$ SEM of three independent experiments, recorded at day 21-28 post-NEUROG2-induction (PNI); \* $p < 0.05$ . (B) Multi-electrode array recording of the mean firing rate at one-week interval from week 4 to week 8 PNI. 43 different wells were recorded from 6 independent experiments. Values are presented as mean $\pm$ SEM. (C) Multi-electrode array recording of the mean firing rate of control 19-2 neurons upon treatments with different receptor inhibitors. Values were acquired in four consecutive readings, i.e., before (read 1) and after addition of GABA receptor inhibitor PTX (read 2), after addition of AMPA receptor inhibitor CNQX (read 3), and after addition of sodium channel blocker TTX (read 4). Four selected active wells were recorded for each group at week 8 PNI. Values are presented as mean $\pm$ SD from a single experiment; \* $p < 0.05$  compared to n/t; n/t = not treated; mV = millivolt; pF = picofarad; mOhm = milliohm; Hz = hertz

Tables S1 Description of selected target transcript and exon for each candidate gene to knockout, as well as the sequence of each guide RNA (gRNA) and template single-stranded oligonucleotide (ssODN) used for gene editing, and sequence of primers and probes used for enrichment of edited cell by droplet digital (ddPCR). Chr = chromosome; ID = identifier; bp = base pair; n/a = not available.

| Gene Symbol                  | chr | Transcript ID     | Exon | Exon ID         | gRNA- (5'-3')           | gRNA+ (5'-3')           | Offset (bp) | FAM probe (5'-3')    | VIC probe (5'-3') | Forward primer ddPCR (5'-3') | Reverse primer ddPCR (5'-3') |
|------------------------------|-----|-------------------|------|-----------------|-------------------------|-------------------------|-------------|----------------------|-------------------|------------------------------|------------------------------|
| ANKRD11                      | 16  | ENST00000378330.6 | 7    | ENSE00003504243 | TCAAAGACTCTCAGCAGAGGG   | CGTCCCGCGGATGGCGCTCGG   | 9           | ATCCCGGGGGACGCC      | CAACCGCGGTAACATA  | AGAACGAGCTGGAGAGAC           | GCTCTGGCCCTTGCC              |
| AUTS2                        | 7   | ENST00000406775.6 | 1    | ENSE00001671293 | GCGGCTTTTGGCGAGTCCATGG  | GTCGCGGTCCGACGAGACCGGG  | 1           | CGGAAAAAGCGGGG       | CAACCGCGGTAACATA  | GAACCATGGATGGCCCGAC          | CGACGAGGAGCGAGTG             |
| ATRX                         | X   | ENST00000373344.9 | 5    | ENSE00001713901 | ATCAGATGATGAAAACCTTTGG  | ACATCTTTGTTAACAATTGAAGG | 3           | TGTAATAAGTATGTAGA    | CAACCGCGGTAACATA  | TCCAGTTGCAAGAACATTCATAATTC   | TGGCAAGCTGTGATGTAAT          |
| CHD8                         | 14  | ENST00000430710.7 | 4    | ENSE00001422532 | GTTGCCAGCGTTCGCGCAGAGG  | TGCTCTCAATTAAGACTGAGG   | 0           | TCTTAAATGAGGACGAGTTG | CAACCGCGGTAACATA  | CGAGGAGCAGAACAATCTCG         | GAGGACCAAGTGTCTACTCT         |
| AF2                          | X   | ENST00000370460.6 | 3    | ENSE00003780313 | TGACTACTCACGCTCCACTGAGG | TAGCACTGATCGGCAAGCGGG   | 6           | TCCAGTATGATCATAAC    | CAACCGCGGTAACATA  | ACACGACACAGAAAATAAAACC       | AGCTCTCCAGTTGGCTTGAGA        |
| CAPRN1                       | 11  | ENST00000341394.8 | 5    | ENSE00003682460 | AACCTCTCTTCGGCAATATTGG  | TAAAGTAGTAGACCTGAACGG   | 21          | CGAAGAGGAGTTGTAT     | CAACCGCGGTAACATA  | GAAATGAAGTCCCAATATTGTC       | TTGTCAACTAAATCTCAGAA         |
| CACNA1C                      | 12  | ENST00000399655.2 | 2    | ENSE00000936250 | CGATGGCCGCTCCACGACAGG   | GCCCGGAGGCTAAGCTGATGG   | 5           | AGCGCCCACTCGACG      | CAACCGCGGTAACATA  | CTGAGCACATCCCACCC            | GGTTTCCATATCTGCTCG           |
| KCNQ2                        | 20  | ENST00000626839.2 | 1    | ENSE00003772915 | GAATTTCTCTCAACGCTGTGG   | CGGTGAAGGCTTGTGCTTGGG   | 9           | ACGCTTCTACGCAA       | CAACCGCGGTAACATA  | CGGGCCGGGGAAGC               | CGATGGGGGCTGCG               |
| SCN2A                        | 2   | ENST00000375437.6 | 2    | ENSE00003607689 | TGCGTTGTTCAATGACGCAAGG  | GAGACCAAACGAGGAACGCAAGG | 19          | AAGCATTGACAGAGA      | CAACCGCGGTAACATA  | CTTCCGCTCTTACACGGGA          | GGAAGAGATTTCTGCTTCCA         |
| ASTN2                        | 9   | ENST00000356787.8 | 16   | ENSE00003567878 | GCTGCTGGAAATCAACGCTGTGG | CCTTGCTGGCGGGGCGCAAGG   | 22          | CAAGGAGACGTGAGC      | CAACCGCGGTAACATA  | TCCATCTACTTCCACCTTTCG        | GGTAGGAGGGGCTGCTCAAGT        |
| DLGAP2                       | 8   | ENST00000637795.1 | 5    | ENSE00003797478 | CGGGGCTGGTCCGACTTCCGG   | CACGCTGGTCTGGGCGCCCCGG  | 14          | AGCCCGCTGTGTT        | CAACCGCGGTAACATA  | CCCAGGACATGAAGGGC            | GCTCAGCAGTAGGGCCG            |
| CHTNAP2                      | 7   | ENST00000351727.7 | 4    | ENSE00001369431 | TCGGATCTCTAATTGTGCGGG   | CTATGTGGCATAGTGTGCTTGG  | 10          | TACAGCATCGATTA       | CAACCGCGGTAACATA  | CGGAAACATTAACTTGACGG         | ACCTCCCAAAAHTTAAACATACG      |
| TENM1                        | X   | ENST00000371130.7 | 1    | ENSE00000857625 | GACCTGCACAGATATACCAGG   | CTGGAGTGTATGACTGCTTGG   | 3           | CAAGACATCATAAC       | CAACCGCGGTAACATA  | ACCAAAGCAAGATGAAATGGA        | AGCTCTGTATTACTCTGTC          |
| ANOS1                        | X   | ENST0000026248.7  | 6    | ENSE00001090930 | GTAATGTGATGGAACCTCGAGG  | TGGAACCTGTACATCGCTGG    | 9           | CCAGTTCGATGGCT       | CAACCGCGGTAACATA  | CTCAGATAGAACACAGCCGA         | ATTCGTGTGCGGAGAAAGGA         |
| AF2 (validation in 50B line) | X   | ENST00000370460.6 | 3    | ENSE00003780313 | n/a                     | GGCTTGGCAGTACAGTCTGAGG  | n/a         | TCACTGTATGATCATAAC   | CAACCGCGGTAACATA  | ACACGACAAAGAAAATAAAACC       | AGTCTTCCAGTTGGCTTGAGA        |

| Gene Symbol                  | ssODN template sequence (5'-3')                                                                                                                                                     |
|------------------------------|-------------------------------------------------------------------------------------------------------------------------------------------------------------------------------------|
| ANKRD11                      | AGATAAGTGAACAGAGAACGAGCGTGAGAGACCCGCTGCACGAGCCGCGCTGGGAAACCCATCCCACTCCCTCTTGGGCTGATTCAACCGCGGTAAGTACTGACGATCAAGAGCTATCAGCGAGGGGGCAGACGTAACGCTAAGGACTTCGAGGTGGACACCCTGTC             |
| AUTS2                        | ACGGGGAGAACCCCGGGCCGAGCAACATGGATGCGCCGACGCGGGCCTGAGCTGGGAAACCCATCCCACTCCCTCTTGGGCTGATTCAACCGCGGTAAGTACTGACGATCGGGTCCAGCAGACCGGGAAGGCGCTCCCGGGCGGGCCGCGGGCCGGCGGGCGG                 |
| ATRX                         | GTCTCAGAAATTTCAATAATTTATGAATTAATTTCTTATAGGAAAATCCTTCAATGGGAAACCCATCCCACTCCCTCTTGGGCTGATTCAACCGCGGTAAGTACTGACGATAGATGAAAACTTTGGATGATGAACTGAAATGAAGATGCTCTATGAAATTCAGA                |
| CHD8                         | AGCAGAGCCAAATGCGAGAGCCGTTGCCGGTGGAGCAACAATCACTCGAGTGGGAAACCCATCCCACTCCCTCTTGGGCTGATTCAACCGCGGTAAGTACTGACCCAGCTTGCGCCAGAGGAGGGAAGGAAACCGAAGAAAGGAGTGTGGGAGAGGCTGAAAG                 |
| AF2                          | TGTGATGACTGAATCACTCAATACACGCAACAGAAATCAAACTCGAGTGGGAAACCCATCCCACTCCCTCTTGGGCTGATTCAACCGCGGTAAGTACTGACCTAGACTGATCGGCAAGCGAGGCTGGTCAAGCAACAGATGCAAGTTGACAGGAGGACGACT                  |
| CAPRN1                       | AGTGCGGACTGACCTGAACAAAGGTTTGAATGGAGTGCCAATTTGGGAAACCCATCCCACTCCCTCTTGGGCTGATTCAACCGCGGTAAGTACTGAGAAATTCTAAGCTAGTACCCCTGAACCGGACATGAGCTGGAGTATGGATTGATAATGAAAG                       |
| CACNA1C                      | GGCAGCGGGGCTCGCCCTGAGCACATCCCACCCCGGGGCTGCCCTGTGCTGGGAAACCCATCCCACTCCCTCTTGGGCTGATTCAACCGCGGTAAGTACTGACCCGCGAGGCTAAGCTGATGGGACGCGCTGGCAATGGACCATCTCCACAGTACGCTCCACGACGGGA           |
| KCNQ2                        | CCTCAGCAAACTCGCGCGGGCCGGCGGGGCGCGGGAACCCCTCAGCGCGGAAACCCATCCCACTCCCTCTTGGGCTGATTCAACCGCGGTAAGTACTGACGAGAAATTCTCTACACGCTGCTGGAGCGCCGGCGGCTGGGCTGTATCTACACGCTCACTGTGTGAG              |
| SCN2A                        | CACAGTCAAGTGTCTTACCGCCGAGCAGCTGACAGTTCGCTCTTACAGCGAAATCCCTGCTGCGGAAACCCATCCCACTCCCTCTTGGGCTGATTCAACCGCGGTAAGTACTGACGTAAGGCTAAGGACCAACAGAAAGGAAAGGAGGATGATGAATGGCCAAAGCCAAAGCAAGTGAC |
| ASTN2                        | TCGCTGTGAGAGAAAGGGCCCTGTCTACTCACTGTACCTTGTGCGGAAACCCATCCCACTCCCTCTTGGGCTGATTCAACCGCGGTAAGTACTGACCTGGAATCAACCGCTGTCAGCTTTACTCTTAACGATGAGAAACAGAA                                     |
| DLGAP2                       | GGAGCCGCTACTCCCGCGCGGAGATGAAAGGGCTCTCCGGAATGCGGAAACCCATCCCACTCCCTCTTGGGCTGATTCAACCGCGGTAAGTACTGAGGACACAGCTGTGGCTGGCGGCCCGGAGGACTGGAGACCTCACACCGGGCCGACGGCGGC                        |
| CHTNAP2                      | TTAAATAACTTCTTCTTCCAGCCATTCCCGGAACATTAATCTCAGCGTGTGCTCGGACGAAAGGAAACCCATCCCACTCCCTCTTGGGCTGATTCAACCGCGGTAAGTACTGACCTATGCTGACATGTCCTGTGATGAAAGAGAAAGCTGACAGGACTGGAATGAGTTAT          |
| TENM1                        | TAGCTTACACAGTCTCTCTGATGAAGTGAAGAGTGAAGGAAACAGACTATACAACTCGAGTGGGAAACCCATCCCACTCCCTCTTGGGCTGATTCAACCGCGGTAAGTACTGACCCCTGACAGATATAACCGAGCTGAGGATGAAATACATAGCCAGAGTGAAGAAAGAAAGAT      |
| ANOS1                        | TCAGACACAGCGAGGCTGATCACTGACATAGAACACAGCCAGCCGATGGGAAACCCATCCCACTCCCTCTTGGGCTGATTCAACCGCGGTAAGTACTGAGTGAATGATGGAATCGAGGCTTCTGCCCACAAACATCCCTGCTTCTCCCAAGGTGAGTCTCT                   |
| AF2 (validation in 50B line) | TGTGATGACTGAATCACTCAATACAGCAACAAAGAAATCAAACTGAGTGGGAAACCCATCCCACTCCCTCTTGGGCTGATTCAACCGCGGTAAGTACTGACCAAGCCAGCGAGTGTACGCAAAAGATGCAAGTGTGACAGGACCGGAGT                               |

Table S2 Number of enrichment steps (or plates) required to isolate a 100% (homozygous or hemizygous) or 50% (heterozygous) StopTag iPSC population for each candidate genes. Shaded area indicates unsuccessful attempts. n/a = not available; RNP = ribonucleoprotein

| Gene     | vector      | plate 1    | plate 2    | plate 3    | plate 4     | plate 5     | plate 6    | RPKM - iPS ctrl 19-2 |
|----------|-------------|------------|------------|------------|-------------|-------------|------------|----------------------|
| ANKRD11  | plasmids    | A4 = 0.4   | E8 = 0.3   | E10 = 2.6  | A4 = 28.2   | F9 = 4.8    | C1 = 15.1  | 26.2                 |
| AUTS2    | plasmids    | H3 = 0.5   | A12 = 3.1  | A10 = 0.4  | n/a         | n/a         | n/a        | 16.6                 |
| ATRX     | plasmids    | E11 = 1.2  | C8 = 2.4   | G2 = 13.9  | A5 = 100.0  | n/a         | n/a        | 17.7                 |
| CHD8     | plasmids    | E1 = 0.8   | B9 = 2.5   | C11 = 28.5 | E1 = 47.7   | G8 = 52.4   | G1 = 52.7  | 27.8                 |
| AFF2     | plasmids    | F3 = 7.0   | H2 = 100.0 | n/a        | n/a         | n/a         | n/a        | 1.7                  |
| CAPRIN1  | plasmids    | G1 = 0.6   | D8 = 0.2   | E1 = 0.8   | D1 = 0.06   | n/a         | n/a        | 110.9                |
| CACNA1C  | plasmids    | D9 = 1.6   | D10 = 6.7  | F10 = 15.4 | H7F3 = 44.3 | A4 = 100.0  | n/a        | 0.2                  |
| KCNQ2    | plasmids    | H1 = 1.6   | E9 = 1.4   | G5 = 8.4   | F11 = 26.5  | E1 = 47.2   | C1 = 52.4  | 7.8                  |
| SCN2A    | plasmids    | G6 = 2.0   | D2 = 10.9  | E8 = 48.5  | D2 = 68.9   | B6 = 86.2   | A8 = 100.0 | 0.3                  |
| ASTN2    | plasmids    | C4 = 3.3   | D6 = 12.1  | A2 = 43.0  | G1 = 100.0  | n/a         | n/a        | 2.9                  |
| DLGAP2   | plasmids    | C1 = 3.9   | F10 = 1.7  | B8 = 14.8  | F9 = 63.0   | C4 = 100.0  | n/a        | 0.2                  |
| CNTNAP2  | plasmids    | G7 = 0.2   | E2 = 2.0   | F9 = 12.7  | n/a         | n/a         | n/a        | 19.3                 |
| TENM1    | plasmids    | B10 = 11.3 | C9 = 7.0   | C7 = 19.1  | F1 = 100.0  | n/a         | n/a        | 0.2                  |
| ANOS1    | plasmids    | A1 = 3.0   | C8 = 4.6   | E4 = 19.0  | C6 = 88.6   | H10 = 100.0 | n/a        | 35.8                 |
| 50B-AFF2 | RNP complex | F4 = 7.3   | F8 = 89.0  | A1 = 100.0 | n/a         | n/a         | n/a        | n/a                  |

Table S3 Identification of SNV/indel calls specific to the different KO line genomes with respect to the 19-2 control genome. Only calls flanked with a matching gRNA sequence (up to five mismatches) within 200 bp on each side are presented. REF = reference; ALT = alternative; Nb = number; bp = base pair

| KO Line    | Chr | Strand | Variant Site | REF | ALT     | Explored Locus      | gRNA Site | Nb Mismatch | Mismatch Pos. | gRNA Sequence       | gRNA Name     | Diagnostic                                                         |
|------------|-----|--------|--------------|-----|---------|---------------------|-----------|-------------|---------------|---------------------|---------------|--------------------------------------------------------------------|
| ATRX-/y    | X   | +      | 76952179     | C   | StopTag | 76951962-76952397   | 76952168  | 0           | 19            | CATACTTTGTTACAATTGA | ATRX gRNA+    | StopTag insertion on-target                                        |
| ATRX-/y    | X   | -      | 76952179     | G   | StopTag | 76951962-76952397   | 76952144  | 0           | 19            | AAGGTTTTTCATCATCTGA | ATRX gRNA-    | StopTag insertion on-target                                        |
| ATRX-/y    | 14  | +      | 93462922     | TA  | T       | 93462722-93463122   | 93463005  | 2           | 9C4G4         | TCAGATGATCAAAAGCCTT | ATRX gRNA-    | 1-bp deletion off-target, 98 bp away from cut site; intronic ITPK1 |
| CHD8+/-    | 14  | +      | 21896163     | A   | StopTag | 21895961-21896366   | 21896168  | 0           | 19            | CGTCTCATTTAAGACTCG  | CHD8 gRNA+    | StopTag insertion on-target                                        |
| CHD8+/-    | 14  | -      | 21896163     | T   | StopTag | 21895961-21896366   | 21896147  | 0           | 19            | CTGGCCGAACGCTGGGCAA | CHD8 gRNA-    | StopTag insertion on-target                                        |
| AFF2-/y    | X   | -      | 147743734    | A   | StopTag | 147743525-147743943 | 147743721 | 0           | 19            | GAGTGGTCACGTGATAGTC | AFF2 gRNA-    | StopTag insertion on-target                                        |
| AFF2-/y    | X   | +      | 147743734    | T   | StopTag | 147743525-147743943 | 147743748 | 0           | 19            | AGCACTGTACTGGCAAGCC | AFF2 gRNA+    | StopTag insertion on-target                                        |
| CACNA1C-/- | 12  | -      | 2224504      | G   | StopTag | 2224296-2224713     | 2224491   | 0           | 19            | GTCGTGGCAGGCGGCCATC | CACNA1C gRNA- | StopTag insertion on-target                                        |
| CACNA1C-/- | 12  | +      | 2224504      | C   | StopTag | 2224296-2224713     | 2224517   | 0           | 19            | CCCGCAGGCTAAGCTGAT  | CACNA1C gRNA+ | StopTag insertion on-target                                        |
| KCNQ2-/y   | 20  | +      | 62103590     | T   | StopTag | 62103375-62103806   | 62103595  | 0           | 19            | GGTAGAAGCGTTGCGCTT  | KCNQ2 gRNA+   | StopTag insertion on-target                                        |
| KCNQ2-/y   | 20  | -      | 62103590     | A   | StopTag | 62103375-62103806   | 62103565  | 0           | 19            | GCACGTTGTAGAGGAAATT | KCNQ2 gRNA-   | StopTag insertion on-target                                        |
| SCN2A-/y   | 2   | -      | 166152415    | G   | StopTag | 166152205-166152625 | 166152400 | 0           | 19            | TGCTGCTATTGAACAACGC | SCN2A gRNA-   | StopTag insertion on-target                                        |
| SCN2A-/y   | 2   | +      | 166152415    | C   | StopTag | 166152205-166152625 | 166152440 | 0           | 19            | AGACCCAAACAGGAACGCA | SCN2A gRNA+   | StopTag insertion on-target                                        |
| ASTN2-/y   | 9   | +      | 119413904    | C   | StopTag | 119413689-119414120 | 119413895 | 0           | 19            | CTGCCTGGCCGGCGGCAA  | ASTN2 gRNA+   | StopTag insertion on-target                                        |
| ASTN2-/y   | 9   | -      | 119413904    | G   | StopTag | 119413689-119414120 | 119413852 | 0           | 19            | CACGTTGATTTCCAGCAG  | ASTN2 gRNA-   | StopTag insertion on-target                                        |
| DLGAP2-/y  | 8   | -      | 1496893      | G   | StopTag | 1496683-1497104     | 1496877   | 0           | 19            | GAAGTCGGACCCAGCCGCC | DLGAP2 gRNA-  | StopTag insertion on-target                                        |
| DLGAP2-/y  | 8   | +      | 1496893      | C   | StopTag | 1496683-1497104     | 1496912   | 0           | 19            | ACGTGTGGTCTGGCGCCCC | DLGAP2 gRNA+  | StopTag insertion on-target                                        |
| TENM1-/y   | X   | +      | 124097473    | C   | StopTag | 124097270-124097676 | 124097477 | 0           | 19            | TGGAGTTGTATGACTGTCT | TENM1 gRNA+   | StopTag insertion on-target                                        |
| TENM1-/y   | X   | -      | 124097473    | G   | StopTag | 124097270-124097676 | 124097453 | 0           | 19            | GGTTATACTGTGCAGGGT  | TENM1 gRNA-   | StopTag insertion on-target                                        |
| ANOS1-/y   | X   | +      | 8553378      | T   | StopTag | 8553167-8553589     | 8553380   | 0           | 19            | CGAAACTGGTACCATCGGC | ANOS1 gRNA+   | StopTag insertion on-target                                        |
| ANOS1-/y   | X   | -      | 8553378      | A   | StopTag | 8553167-8553589     | 8553350   | 0           | 19            | CGAGTTCATGCACATTCA  | ANOS1 gRNA-   | StopTag insertion on-target                                        |



**Table S4** Distance between premature termination codon insertion (StopTag) and the next upstream and downstream exon-exon junctions (e-e) or wildtype (wt) start or stop codons. chr = chromosome; ins. = insertion; dist. = distance; NMD = nonsense-mediated decay

| Gene    | chr | exon  | ins. site   | dist. 5'e-e | dist. 3'e-e | decreased transcript |                                     |
|---------|-----|-------|-------------|-------------|-------------|----------------------|-------------------------------------|
|         |     |       |             |             |             | levels (Fig. 2b)     | possible explanation                |
| ATRX    | X   | 5/35  | 77,696,639  | 62          | 97          | yes                  | NMD                                 |
| CHD8    | 14  | 4/38  | 21,428,112  | 243         | 130         | yes                  | NMD                                 |
| AFF2    | X   | 3/21  | 148,661,908 | 351         | 546         | yes                  | NMD                                 |
| CACNA1C | 12  | 2/47  | 2,115,379   | 155         | 197         | no                   | higher mRNA stability               |
| KCNQ2   | 20  | 1/16  | 63,472,426  | 258         | 65          | no                   | higher mRNA stability               |
| SCN2A   | 2   | 2/27  | 165,295,894 | 121         | 171         | no                   | higher mRNA stability               |
| ASTN2   | 9   | 16/22 | 116,651,743 | 215         | 75          | yes                  | NMD                                 |
| DLGAP2  | 8   | 5/15  | 1,548,767   | 141         | 945         | no                   | higher mRNA stability               |
| TENM1   | X   | 1/31  | 124,963,689 | 152         | 85          | no                   | StopTag <200bp downstream of wt AUG |
| ANOS1   | X   | 6/14  | 8,585,364   | 97          | 61          | yes                  | NMD                                 |
